# Supplementary material for: A Two-Step Feature Selection Method to Predict Cancerlectins by Multiview Features and Synthetic Minority Oversampling Technique
Source: Biomed Res Int. 2018 Feb 7;2018:9364182. doi: 10.1155/2018/9364182 (PMC5820548; doi:10.1155/2018/9364182)
Supplement: Supplementary 2 — The score for each of the features evaluated by Relief. [file 9364182.f2.xls]

## Sheet: Sheet1
Id	Feature	Score
1	ctd_1	-0.001072
2	ctd_2	0.001031
3	ctd_3	0.001039
4	ctd_4	0.001175
5	ctd_5	-0.002412
6	ctd_6	-0.003391
7	ctd_7	0.001392
8	ctd_8	-0.000644
9	ctd_9	-0.001108
10	ctd_10	-0.001229
11	ctd_11	-0.001072
12	ctd_12	0.001392
13	ctd_13	0.000319
14	ctd_14	0.000867
15	ctd_15	0.000925
16	ctd_16	0.001031
17	ctd_17	0.001392
18	ctd_18	0.001564
19	ctd_19	0.001318
20	ctd_20	0.001146
21	ctd_21	0.001039
22	ctd_22	1.8e-05
23	ctd_23	-0.000255
24	ctd_24	-0.001751
25	ctd_25	-0.001925
26	ctd_26	0.000629
27	ctd_27	0.002152
28	ctd_28	0.001392
29	ctd_29	-0.000335
30	ctd_30	-9e-05
31	ctd_31	-0.000159
32	ctd_32	1.8e-05
33	ctd_33	0.001392
34	ctd_34	-0.000258
35	ctd_35	-0.000134
36	ctd_36	-0.000196
37	ctd_37	-0.000255
38	ctd_38	0.001392
39	ctd_39	-0.001817
40	ctd_40	-0.001801
41	ctd_41	-0.001724
42	ctd_42	-0.001751
43	ctd_43	-0.000726
44	ctd_44	-0.000513
45	ctd_45	-0.001585
46	ctd_46	-0.001333
47	ctd_47	-0.002424
48	ctd_48	0.000419
49	ctd_49	0.001392
50	ctd_50	6.5e-05
51	ctd_51	-0.00052
52	ctd_52	-0.000647
53	ctd_53	-0.000726
54	ctd_54	0.001392
55	ctd_55	-0.000499
56	ctd_56	-0.000327
57	ctd_57	-0.000515
58	ctd_58	-0.000513
59	ctd_59	0.001392
60	ctd_60	-0.001889
61	ctd_61	-0.00171
62	ctd_62	-0.001702
63	ctd_63	-0.001585
64	ctd_64	0.00395
65	ctd_65	0.00683
66	ctd_66	-0.001751
67	ctd_67	-0.006072
68	ctd_68	0.005261
69	ctd_69	0.000585
70	ctd_70	0.001392
71	ctd_71	0.003251
72	ctd_72	0.00378
73	ctd_73	0.003715
74	ctd_74	0.00395
75	ctd_75	0.001392
76	ctd_76	0.006921
77	ctd_77	0.007172
78	ctd_78	0.007214
79	ctd_79	0.00683
80	ctd_80	0.001392
81	ctd_81	-0.001817
82	ctd_82	-0.001801
83	ctd_83	-0.001724
84	ctd_84	-0.001751
85	ctd_85	-0.000604
86	ctd_86	0.000255
87	ctd_87	-7.2e-05
88	ctd_88	-0.001241
89	ctd_89	0.001788
90	ctd_90	0.001272
91	ctd_91	0.001392
92	ctd_92	0.000178
93	ctd_93	-0.000466
94	ctd_94	-0.000789
95	ctd_95	-0.000604
96	ctd_96	0.001392
97	ctd_97	0.000324
98	ctd_98	0.000707
99	ctd_99	0.000539
100	ctd_100	0.000255
101	ctd_101	0.001392
102	ctd_102	-0.000137
103	ctd_103	-0.000118
104	ctd_104	2.3e-05
105	ctd_105	-7.2e-05
106	ctd_106	0.008039
107	ctd_107	0.003726
108	ctd_108	0.002275
109	ctd_109	-0.001334
110	ctd_110	-0.000861
111	ctd_111	0.008316
112	ctd_112	0.001392
113	ctd_113	0.00824
114	ctd_114	0.008122
115	ctd_115	0.008204
116	ctd_116	0.008039
117	ctd_117	0.001392
118	ctd_118	0.004214
119	ctd_119	0.003869
120	ctd_120	0.003893
121	ctd_121	0.003726
122	ctd_122	0.001392
123	ctd_123	0.00246
124	ctd_124	0.002585
125	ctd_125	0.002369
126	ctd_126	0.002275
127	ctd_127	0.003105
128	ctd_128	-0.001072
129	ctd_129	-0.000166
130	ctd_130	0.001386
131	ctd_131	-0.001144
132	ctd_132	0.002165
133	ctd_133	0.001392
134	ctd_134	0.002784
135	ctd_135	0.003192
136	ctd_136	0.003316
137	ctd_137	0.003105
138	ctd_138	0.001392
139	ctd_139	-0.000644
140	ctd_140	-0.001108
141	ctd_141	-0.001229
142	ctd_142	-0.001072
143	ctd_143	0.001392
144	ctd_144	4.1e-05
145	ctd_145	-0.000147
146	ctd_146	-0.000177
147	ctd_147	-0.000166
148	pseaac_1	0.000777
149	pseaac_2	0.005306
150	pseaac_3	0.00382
151	pseaac_4	0.001718
152	pseaac_5	3.4e-05
153	pseaac_6	0.001793
154	pseaac_7	-0.001111
155	pseaac_8	0.000354
156	pseaac_9	0.000718
157	pseaac_10	0.002431
158	pseaac_11	-0.000552
159	pseaac_12	0.007282
160	pseaac_13	0.005746
161	pseaac_14	-0.000687
162	pseaac_15	0.003385
163	pseaac_16	0.00175
164	pseaac_17	0.00053
165	pseaac_18	-0.00288
166	pseaac_19	0.003503
167	pseaac_20	0.001383
168	pseaac_21	0.002099
169	pseaac_22	4.2e-05
170	pseaac_23	0.001284
171	pseaac_24	-0.000538
172	pseaac_25	-0.000697
173	pseaac_26	0.003044
174	pseaac_27	0.001256
175	pseaac_28	0.000618
176	pseaac_29	0.001155
177	pseaac_30	0.001503
178	pseaac_31	0.000809
179	pseaac_32	0.002351
180	pseaac_33	-0.001348
181	pseaac_34	0.000143
182	pseaac_35	0.000749
183	pseaac_36	-0.000405
184	pseaac_37	0.001245
185	pseaac_38	0.000651
186	pseaac_39	-0.001221
187	pseaac_40	-0.001166
188	pseaac_41	0.000968
189	pseaac_42	0.001425
190	pseaac_43	-0.000166
191	pseaac_44	0.000189
192	pseaac_45	-0.000574
193	pseaac_46	0.000431
194	pseaac_47	-0.000253
195	pseaac_48	0.001115
196	pseaac_49	0.000597
197	pseaac_50	-0.000981
198	pseaac_51	-0.000315
199	pseaac_52	-0.000198
200	pseaac_53	-0.001684
201	pseaac_54	7.1e-05
202	pseaac_55	0.000279
203	pseaac_56	0.000421
204	pseaac_57	0.000965
205	pseaac_58	-0.001506
206	pseaac_59	0.000319
207	pseaac_60	-0.000981
208	pseaac_61	-0.000132
209	pseaac_62	0.000812
210	pseaac_63	-0.000757
211	pseaac_64	0.000573
212	pseaac_65	0.000708
213	pseaac_66	0.000878
214	pseaac_67	0.001146
215	pseaac_68	-0.000398
216	pseaac_69	-0.000768
217	pseaac_70	-2.3e-05
218	pssm_1	0.002774
219	pssm_2	0.003903
220	pssm_3	0.004215
221	pssm_4	0.000807
222	pssm_5	0.00469
223	pssm_6	0.002361
224	pssm_7	0.00235
225	pssm_8	0.003206
226	pssm_9	0.001708
227	pssm_10	0.002692
228	pssm_11	0.001752
229	pssm_12	0.002144
230	pssm_13	0.00258
231	pssm_14	0.00265
232	pssm_15	0.002006
233	pssm_16	0.002388
234	pssm_17	0.000988
235	pssm_18	0.002489
236	pssm_19	0.002787
237	pssm_20	0.002689
238	pssm_21	0.006627
239	pssm_22	0.010707
240	pssm_23	0.00646
241	pssm_24	0.004339
242	pssm_25	0.00973
243	pssm_26	0.003922
244	pssm_27	0.00237
245	pssm_28	0.002206
246	pssm_29	0.014026
247	pssm_30	0.002593
248	pssm_31	0.000292
249	pssm_32	0.006343
250	pssm_33	0.004212
251	pssm_34	0.002294
252	pssm_35	0.009436
253	pssm_36	0.003889
254	pssm_37	0.004897
255	pssm_38	0.008571
256	pssm_39	0.004692
257	pssm_40	0.001873
258	pssm_41	0.002217
259	pssm_42	0.006876
260	pssm_43	0.007304
261	pssm_44	0.001859
262	pssm_45	0.004219
263	pssm_46	0.005469
264	pssm_47	0.00679
265	pssm_48	0.003298
266	pssm_49	0.004622
267	pssm_50	0.005156
268	pssm_51	0.010614
269	pssm_52	0.002902
270	pssm_53	0.007294
271	pssm_54	-0.001502
272	pssm_55	0.006005
273	pssm_56	0.001849
274	pssm_57	-0.00091
275	pssm_58	0.001208
276	pssm_59	0.003255
277	pssm_60	0.001149
278	pssm_61	0.006292
279	pssm_62	0.006889
280	pssm_63	0.007471
281	pssm_64	0.002296
282	pssm_65	0.003004
283	pssm_66	0.008408
284	pssm_67	0.00714
285	pssm_68	0.002927
286	pssm_69	0.000362
287	pssm_70	0.003418
288	pssm_71	0.003696
289	pssm_72	0.00955
290	pssm_73	0.00227
291	pssm_74	0.003145
292	pssm_75	0.002889
293	pssm_76	0.006447
294	pssm_77	-0.000445
295	pssm_78	0.006689
296	pssm_79	0.000614
297	pssm_80	0.003956
298	pssm_81	0.009929
299	pssm_82	-0.001472
300	pssm_83	0.00172
301	pssm_84	0.001066
302	pssm_85	0.003404
303	pssm_86	0.003758
304	pssm_87	0.003088
305	pssm_88	0.001371
306	pssm_89	-4.7e-05
307	pssm_90	0.004917
308	pssm_91	0.004714
309	pssm_92	0.001331
310	pssm_93	0.001157
311	pssm_94	0.003098
312	pssm_95	0.00302
313	pssm_96	0.005226
314	pssm_97	0.00349
315	pssm_98	0.001257
316	pssm_99	0.003617
317	pssm_100	0.006789
318	pssm_101	0.003874
319	pssm_102	0.004793
320	pssm_103	0.003157
321	pssm_104	0.00383
322	pssm_105	0.004029
323	pssm_106	0.007004
324	pssm_107	0.00152
325	pssm_108	0.003754
326	pssm_109	0.001538
327	pssm_110	0.004623
328	pssm_111	0.002993
329	pssm_112	0.007831
330	pssm_113	-0.000196
331	pssm_114	0.004843
332	pssm_115	0.002498
333	pssm_116	0.001829
334	pssm_117	0.00183
335	pssm_118	0.003641
336	pssm_119	0.002834
337	pssm_120	0.007856
338	disorder_1	0.002432
339	disorder_2	0.00163
340	disorder_3	-0.00053
341	disorder_4	0.002398
342	disorder_5	5.1e-05
343	disorder_6	-0.000295
344	disorder_7	-0.001039
345	disorder_8	-0.001253
346	disorder_9	0.003031
347	disorder_10	0.002447
348	disorder_11	-0.002736
349	disorder_12	-0.001285
350	disorder_13	-0.004304
351	disorder_14	-0.000306
352	disorder_15	0.001119
353	disorder_16	0.000756
354	disorder_17	0.0014
355	disorder_18	-0.00041
356	disorder_19	-0.000808
357	disorder_20	-0.000448
358	disorder_21	-0.000187
359	disorder_22	0.006373
360	disorder_23	0.001184
361	disorder_24	0.001166
362	disorder_25	0.003324
363	disorder_26	-6.3e-05
364	disorder_27	0.009709
365	disorder_28	0.000245
