# Supplementary material for: A Two-Step Feature Selection Method to Predict Cancerlectins by Multiview Features and Synthetic Minority Oversampling Technique
Source: Biomed Res Int. 2018 Feb 7;2018:9364182. doi: 10.1155/2018/9364182 (PMC5820548; doi:10.1155/2018/9364182)
Supplement: Supplementary 3 — The detailed prediction results against different numbers of features by performing the SFS scheme. [file 9364182.f3.xls]

## Sheet: Sheet1
ID	FP	FN	TN	TP	SN	SP	ACC	MCC	AUC
1	83	94	143	132	0.584071	0.632743	0.608407	0.217071	0.599577
2	84	79	142	147	0.650442	0.628319	0.639381	0.278829	0.673976
3	78	77	148	149	0.659292	0.654867	0.65708	0.314162	0.694847
4	71	77	155	149	0.659292	0.685841	0.672566	0.345254	0.712252
5	72	66	154	160	0.707965	0.681416	0.69469	0.389518	0.73559
6	65	67	161	159	0.70354	0.712389	0.707965	0.415946	0.739711
7	64	68	162	158	0.699115	0.716814	0.707965	0.415994	0.759398
8	67	65	159	161	0.712389	0.70354	0.707965	0.415946	0.760827
9	66	56	160	170	0.752212	0.707965	0.730088	0.460628	0.769216
10	68	60	158	166	0.734513	0.699115	0.716814	0.4339	0.762335
11	67	60	159	166	0.734513	0.70354	0.719027	0.438263	0.758624
12	60	65	166	161	0.712389	0.734513	0.723451	0.447012	0.760729
13	64	50	162	176	0.778761	0.716814	0.747788	0.496529	0.787121
14	65	56	161	170	0.752212	0.712389	0.732301	0.464971	0.772359
15	63	60	163	166	0.734513	0.721239	0.727876	0.455792	0.764762
16	64	53	162	173	0.765487	0.716814	0.74115	0.482873	0.761356
17	67	57	159	169	0.747788	0.70354	0.725664	0.45177	0.753279
18	65	57	161	169	0.747788	0.712389	0.730088	0.460466	0.760122
19	67	54	159	172	0.761062	0.70354	0.732301	0.465372	0.771018
20	65	53	161	173	0.765487	0.712389	0.738938	0.478551	0.776539
21	65	55	161	171	0.756637	0.712389	0.734513	0.469486	0.765917
22	64	56	162	170	0.752212	0.716814	0.734513	0.469321	0.77647
23	61	62	165	164	0.725664	0.730088	0.727876	0.455757	0.752575
24	68	55	158	171	0.756637	0.699115	0.727876	0.456508	0.775883
25	66	56	160	170	0.752212	0.707965	0.730088	0.460628	0.758595
26	70	55	156	171	0.756637	0.690265	0.723451	0.44789	0.768482
27	63	58	163	168	0.743363	0.721239	0.732301	0.464716	0.770538
28	62	59	164	167	0.738938	0.725664	0.732301	0.464643	0.771282
29	65	51	161	175	0.774336	0.712389	0.743363	0.487662	0.78297
30	67	60	159	166	0.734513	0.70354	0.719027	0.438263	0.77092
31	67	54	159	172	0.761062	0.70354	0.732301	0.465372	0.758057
32	65	55	161	171	0.756637	0.712389	0.734513	0.469486	0.781483
33	66	62	160	164	0.725664	0.707965	0.716814	0.433696	0.779035
34	70	51	156	175	0.774336	0.690265	0.732301	0.466252	0.774796
35	67	54	159	172	0.761062	0.70354	0.732301	0.465372	0.780161
36	68	50	158	176	0.778761	0.699115	0.738938	0.479399	0.790929
37	65	56	161	170	0.752212	0.712389	0.732301	0.464971	0.77511
38	69	57	157	169	0.747788	0.69469	0.721239	0.443103	0.776637
39	69	54	157	172	0.761062	0.69469	0.727876	0.456759	0.786377
40	63	59	163	167	0.738938	0.721239	0.730088	0.460249	0.779534
41	64	57	162	169	0.747788	0.716814	0.732301	0.464825	0.785105
42	69	50	157	176	0.778761	0.69469	0.736726	0.475133	0.775677
43	70	55	156	171	0.756637	0.690265	0.723451	0.44789	0.772917
44	68	52	158	174	0.769912	0.699115	0.734513	0.470206	0.777361
45	70	55	156	171	0.756637	0.690265	0.723451	0.44789	0.777156
46	67	52	159	174	0.769912	0.70354	0.736726	0.474498	0.780092
47	63	53	163	173	0.765487	0.721239	0.743363	0.487203	0.788844
48	71	57	155	169	0.747788	0.685841	0.716814	0.434463	0.764958
49	70	54	156	172	0.761062	0.690265	0.725664	0.452463	0.759212
50	64	62	162	164	0.725664	0.716814	0.721239	0.442495	0.767454
51	59	57	167	169	0.747788	0.738938	0.743363	0.486745	0.790087
52	62	57	164	169	0.747788	0.725664	0.736726	0.473567	0.770479
53	65	57	161	169	0.747788	0.712389	0.730088	0.460466	0.778272
54	64	57	162	169	0.747788	0.716814	0.732301	0.464825	0.777156
55	66	53	160	173	0.765487	0.707965	0.736726	0.474237	0.778526
56	66	55	160	171	0.756637	0.707965	0.732301	0.465153	0.790596
57	63	62	163	164	0.725664	0.721239	0.723451	0.446907	0.779564
58	64	59	162	167	0.738938	0.716814	0.727876	0.455864	0.777851
59	65	54	161	172	0.761062	0.712389	0.736726	0.474013	0.777674
60	74	45	152	181	0.800885	0.672566	0.736726	0.477398	0.785594
61	67	52	159	174	0.769912	0.70354	0.736726	0.474498	0.779172
62	65	57	161	169	0.747788	0.712389	0.730088	0.460466	0.776372
63	68	57	158	169	0.747788	0.699115	0.723451	0.447433	0.765722
64	69	50	157	176	0.778761	0.69469	0.736726	0.475133	0.77835
65	68	53	158	173	0.765487	0.699115	0.732301	0.465629	0.760964
66	69	50	157	176	0.778761	0.69469	0.736726	0.475133	0.779211
67	64	57	162	169	0.747788	0.716814	0.732301	0.464825	0.778399
68	69	54	157	172	0.761062	0.69469	0.727876	0.456759	0.778311
69	69	60	157	166	0.734513	0.69469	0.714602	0.429544	0.763225
70	66	53	160	173	0.765487	0.707965	0.736726	0.474237	0.775531
71	69	57	157	169	0.747788	0.69469	0.721239	0.443103	0.760876
72	69	50	157	176	0.778761	0.69469	0.736726	0.475133	0.766436
73	77	47	149	179	0.792035	0.659292	0.725664	0.455357	0.774444
74	68	51	158	175	0.774336	0.699115	0.736726	0.474797	0.77093
75	71	49	155	177	0.783186	0.685841	0.734513	0.471265	0.771018
76	66	56	160	170	0.752212	0.707965	0.730088	0.460628	0.776
77	73	51	153	175	0.774336	0.676991	0.725664	0.453481	0.751987
78	67	54	159	172	0.761062	0.70354	0.732301	0.465372	0.784038
79	74	53	152	173	0.765487	0.672566	0.719027	0.439957	0.763382
80	71	54	155	172	0.761062	0.685841	0.723451	0.448172	0.779485
81	65	62	161	164	0.725664	0.712389	0.719027	0.438092	0.766652
82	68	59	158	167	0.738938	0.699115	0.719027	0.438401	0.771184
83	72	54	154	172	0.761062	0.681416	0.721239	0.443888	0.75512
84	74	52	152	174	0.769912	0.672566	0.721239	0.444589	0.772799
85	74	51	152	175	0.774336	0.672566	0.723451	0.449235	0.763911
86	67	59	159	167	0.738938	0.70354	0.721239	0.442755	0.759584
87	66	61	160	165	0.730088	0.707965	0.719027	0.43816	0.757459
88	69	52	157	174	0.769912	0.69469	0.732301	0.465922	0.775609
89	72	56	154	170	0.752212	0.681416	0.716814	0.434719	0.771928
90	61	57	165	169	0.747788	0.730088	0.738938	0.477951	0.774297
91	66	57	160	169	0.747788	0.707965	0.727876	0.456114	0.765252
92	64	60	162	166	0.734513	0.716814	0.725664	0.451398	0.776323
93	64	64	162	162	0.716814	0.716814	0.716814	0.433628	0.761199
94	64	51	162	175	0.774336	0.716814	0.745575	0.491965	0.77229
95	69	61	157	165	0.730088	0.69469	0.712389	0.425045	0.767308
96	66	60	160	166	0.734513	0.707965	0.721239	0.442634	0.77136
97	71	56	155	170	0.752212	0.685841	0.719027	0.439021	0.759437
98	68	58	158	168	0.743363	0.699115	0.721239	0.442912	0.765124
99	66	57	160	169	0.747788	0.707965	0.727876	0.456114	0.75976
100	68	57	158	169	0.747788	0.699115	0.723451	0.447433	0.769021
101	66	60	160	166	0.734513	0.707965	0.721239	0.442634	0.774894
102	73	56	153	170	0.752212	0.676991	0.714602	0.430423	0.757459
103	71	56	155	170	0.752212	0.685841	0.719027	0.439021	0.763578
104	72	61	154	165	0.730088	0.681416	0.705752	0.411993	0.760954
105	71	57	155	169	0.747788	0.685841	0.716814	0.434463	0.756236
106	68	65	158	161	0.712389	0.699115	0.705752	0.411541	0.748855
107	72	54	154	172	0.761062	0.681416	0.721239	0.443888	0.77414
108	73	55	153	171	0.756637	0.676991	0.716814	0.43501	0.757714
109	68	57	158	169	0.747788	0.699115	0.723451	0.447433	0.777439
110	70	59	156	167	0.738938	0.690265	0.714602	0.429713	0.765683
111	66	58	160	168	0.743363	0.707965	0.725664	0.45161	0.766505
112	66	65	160	161	0.712389	0.707965	0.710177	0.420358	0.760886
113	69	56	157	170	0.752212	0.69469	0.723451	0.447644	0.771683
114	68	55	158	171	0.756637	0.699115	0.727876	0.456508	0.778712
115	67	61	159	165	0.730088	0.70354	0.716814	0.433781	0.768531
116	68	57	158	169	0.747788	0.699115	0.723451	0.447433	0.758243
117	68	61	158	165	0.730088	0.699115	0.714602	0.42941	0.747611
118	67	60	159	166	0.734513	0.70354	0.719027	0.438263	0.761992
119	70	57	156	169	0.747788	0.690265	0.719027	0.43878	0.757362
120	71	60	155	166	0.734513	0.685841	0.710177	0.420853	0.774405
121	68	60	158	166	0.734513	0.699115	0.716814	0.4339	0.762432
122	65	67	161	159	0.70354	0.712389	0.707965	0.415946	0.759231
123	70	57	156	169	0.747788	0.690265	0.719027	0.43878	0.770195
124	66	61	160	165	0.730088	0.707965	0.719027	0.43816	0.756236
125	71	60	155	166	0.734513	0.685841	0.710177	0.420853	0.768551
126	72	56	154	170	0.752212	0.681416	0.716814	0.434719	0.763823
127	68	64	158	162	0.716814	0.699115	0.707965	0.415994	0.760024
128	71	60	155	166	0.734513	0.685841	0.710177	0.420853	0.766652
129	76	51	150	175	0.774336	0.663717	0.719027	0.440758	0.77185
130	72	58	154	168	0.743363	0.681416	0.712389	0.425596	0.758654
131	69	62	157	164	0.725664	0.69469	0.710177	0.420556	0.757528
132	71	60	155	166	0.734513	0.685841	0.710177	0.420853	0.750891
133	64	63	162	163	0.721239	0.716814	0.719027	0.438057	0.765359
134	72	53	154	173	0.765487	0.681416	0.723451	0.44849	0.765076
135	72	51	154	175	0.774336	0.681416	0.727876	0.457733	0.760073
136	70	57	156	169	0.747788	0.690265	0.719027	0.43878	0.750607
137	70	53	156	173	0.765487	0.690265	0.727876	0.457047	0.770489
138	74	54	152	172	0.761062	0.672566	0.716814	0.435336	0.764234
139	66	63	160	163	0.721239	0.707965	0.714602	0.429241	0.754014
140	71	56	155	170	0.752212	0.685841	0.719027	0.439021	0.767934
141	71	57	155	169	0.747788	0.685841	0.716814	0.434463	0.768727
142	70	58	156	168	0.743363	0.690265	0.716814	0.434241	0.759505
143	68	57	158	169	0.747788	0.699115	0.723451	0.447433	0.755002
144	66	63	160	163	0.721239	0.707965	0.714602	0.429241	0.758262
145	70	56	156	170	0.752212	0.690265	0.721239	0.443329	0.761033
146	72	56	154	170	0.752212	0.681416	0.716814	0.434719	0.766818
147	73	55	153	171	0.756637	0.676991	0.716814	0.43501	0.755599
148	73	53	153	173	0.765487	0.676991	0.721239	0.444221	0.767846
149	73	52	153	174	0.769912	0.676991	0.723451	0.448845	0.759496
150	71	56	155	170	0.752212	0.685841	0.719027	0.439021	0.767425
151	74	56	152	170	0.752212	0.672566	0.712389	0.426133	0.750852
152	73	56	153	170	0.752212	0.676991	0.714602	0.430423	0.746329
153	71	55	155	171	0.756637	0.685841	0.721239	0.443591	0.754444
154	62	69	164	157	0.69469	0.725664	0.710177	0.420556	0.758517
155	68	59	158	167	0.738938	0.699115	0.719027	0.438401	0.758928
156	69	53	157	173	0.765487	0.69469	0.730088	0.461335	0.765056
157	69	54	157	172	0.761062	0.69469	0.727876	0.456759	0.762178
158	69	59	157	167	0.738938	0.69469	0.716814	0.434053	0.768844
159	70	59	156	167	0.738938	0.690265	0.714602	0.429713	0.767807
160	65	55	161	171	0.756637	0.712389	0.734513	0.469486	0.767777
161	68	59	158	167	0.738938	0.699115	0.719027	0.438401	0.76347
162	75	54	151	172	0.761062	0.668142	0.714602	0.431069	0.756089
163	72	55	154	171	0.756637	0.681416	0.719027	0.439298	0.769872
164	69	59	157	167	0.738938	0.69469	0.716814	0.434053	0.752535
165	71	58	155	168	0.743363	0.685841	0.714602	0.429915	0.761914
166	74	55	152	171	0.756637	0.672566	0.714602	0.430728	0.751977
167	71	54	155	172	0.761062	0.685841	0.723451	0.448172	0.761522
168	70	58	156	168	0.743363	0.690265	0.716814	0.434241	0.742423
169	65	61	161	165	0.730088	0.712389	0.721239	0.442547	0.760132
170	68	62	158	164	0.725664	0.699115	0.712389	0.424929	0.774062
171	71	56	155	170	0.752212	0.685841	0.719027	0.439021	0.76114
172	76	51	150	175	0.774336	0.663717	0.719027	0.440758	0.767347
173	68	55	158	171	0.756637	0.699115	0.727876	0.456508	0.771282
174	72	59	154	167	0.738938	0.681416	0.710177	0.421051	0.752261
175	69	63	157	163	0.721239	0.69469	0.707965	0.416076	0.755658
176	68	64	158	162	0.716814	0.699115	0.707965	0.415994	0.740867
177	74	59	152	167	0.738938	0.672566	0.705752	0.412414	0.76116
178	66	61	160	165	0.730088	0.707965	0.719027	0.43816	0.76255
179	75	60	151	166	0.734513	0.668142	0.701327	0.403545	0.751547
180	70	63	156	163	0.721239	0.690265	0.705752	0.411702	0.737636
181	69	59	157	167	0.738938	0.69469	0.716814	0.434053	0.746848
182	72	58	154	168	0.743363	0.681416	0.712389	0.425596	0.751782
183	71	60	155	166	0.734513	0.685841	0.710177	0.420853	0.748845
184	68	62	158	164	0.725664	0.699115	0.712389	0.424929	0.751155
185	65	65	161	161	0.712389	0.712389	0.712389	0.424779	0.765262
186	67	64	159	162	0.716814	0.70354	0.710177	0.420391	0.764292
187	71	62	155	164	0.725664	0.685841	0.705752	0.411831	0.742217
188	67	61	159	165	0.730088	0.70354	0.716814	0.433781	0.75695
189	74	61	152	165	0.730088	0.672566	0.701327	0.403323	0.750029
190	77	58	149	168	0.743363	0.659292	0.701327	0.404085	0.737059
191	73	58	153	168	0.743363	0.676991	0.710177	0.421283	0.751253
192	70	62	156	164	0.725664	0.690265	0.707965	0.41619	0.74304
193	66	68	160	158	0.699115	0.707965	0.70354	0.407096	0.750813
194	73	55	153	171	0.756637	0.676991	0.716814	0.43501	0.753142
195	70	65	156	161	0.712389	0.690265	0.701327	0.402753	0.745634
196	72	61	154	165	0.730088	0.681416	0.705752	0.411993	0.759349
197	72	60	154	166	0.734513	0.681416	0.707965	0.416517	0.746632
198	71	58	155	168	0.743363	0.685841	0.714602	0.429915	0.758409
199	68	67	158	159	0.70354	0.699115	0.701327	0.402659	0.759887
200	73	56	153	170	0.752212	0.676991	0.714602	0.430423	0.748404
201	76	59	150	167	0.738938	0.663717	0.701327	0.403799	0.743373
202	76	60	150	166	0.734513	0.663717	0.699115	0.399232	0.751155
203	74	56	152	170	0.752212	0.672566	0.712389	0.426133	0.75279
204	72	57	154	169	0.747788	0.681416	0.714602	0.430152	0.76721
205	73	58	153	168	0.743363	0.676991	0.710177	0.421283	0.759623
206	77	57	149	169	0.747788	0.659292	0.70354	0.408683	0.750852
207	71	57	155	169	0.747788	0.685841	0.716814	0.434463	0.752858
208	68	60	158	166	0.734513	0.699115	0.716814	0.4339	0.755805
209	74	59	152	167	0.738938	0.672566	0.705752	0.412414	0.745585
210	70	61	156	165	0.730088	0.690265	0.710177	0.420688	0.748336
211	73	54	153	172	0.761062	0.676991	0.719027	0.439609	0.755374
212	74	57	152	169	0.747788	0.672566	0.710177	0.421548	0.755139
213	75	63	151	163	0.721239	0.668142	0.69469	0.389931	0.74349
214	71	59	155	167	0.738938	0.685841	0.712389	0.425379	0.749403
215	69	58	157	168	0.743363	0.69469	0.719027	0.438573	0.759143
216	73	57	153	169	0.747788	0.676991	0.712389	0.425847	0.752369
217	72	59	154	167	0.738938	0.681416	0.710177	0.421051	0.746525
218	75	63	151	163	0.721239	0.668142	0.69469	0.389931	0.743627
219	70	63	156	163	0.721239	0.690265	0.705752	0.411702	0.749501
220	74	57	152	169	0.747788	0.672566	0.710177	0.421548	0.759799
221	71	60	155	166	0.734513	0.685841	0.710177	0.420853	0.742785
222	71	61	155	165	0.730088	0.685841	0.707965	0.416337	0.751028
223	74	59	152	167	0.738938	0.672566	0.705752	0.412414	0.752349
224	72	63	154	163	0.721239	0.681416	0.701327	0.402975	0.746231
225	73	63	153	163	0.721239	0.676991	0.699115	0.398621	0.743059
226	77	60	149	166	0.734513	0.659292	0.696903	0.394924	0.752428
227	79	58	147	168	0.743363	0.650442	0.696903	0.395516	0.745448
228	76	62	150	164	0.725664	0.663717	0.69469	0.39013	0.743431
229	77	64	149	162	0.716814	0.659292	0.688053	0.37673	0.73606
230	70	64	156	162	0.716814	0.690265	0.70354	0.407223	0.748512
231	74	58	152	168	0.743363	0.672566	0.707965	0.416975	0.745291
232	67	63	159	163	0.721239	0.70354	0.712389	0.424845	0.764958
233	75	62	151	164	0.725664	0.668142	0.696903	0.394458	0.740818
234	77	62	149	164	0.725664	0.659292	0.692478	0.385806	0.745242
235	78	61	148	165	0.730088	0.654867	0.692478	0.386049	0.751968
236	76	63	150	163	0.721239	0.663717	0.692478	0.385594	0.754572
237	76	62	150	164	0.725664	0.663717	0.69469	0.39013	0.751596
238	80	60	146	166	0.734513	0.646018	0.690265	0.38203	0.734014
239	73	68	153	158	0.699115	0.676991	0.688053	0.376198	0.735189
240	78	63	148	163	0.721239	0.654867	0.688053	0.376937	0.75324
241	70	65	156	161	0.712389	0.690265	0.701327	0.402753	0.74396
242	72	68	154	158	0.699115	0.681416	0.690265	0.380591	0.750813
243	83	60	143	166	0.734513	0.632743	0.683628	0.369173	0.73143
244	77	70	149	156	0.690265	0.659292	0.674779	0.349725	0.727455
245	78	61	148	165	0.730088	0.654867	0.692478	0.386049	0.738018
246	75	69	151	157	0.69469	0.668142	0.681416	0.36296	0.750147
247	79	66	147	160	0.707965	0.650442	0.679204	0.359001	0.735159
248	73	61	153	165	0.730088	0.676991	0.70354	0.407655	0.749765
249	83	68	143	158	0.699115	0.632743	0.665929	0.332592	0.72676
250	79	69	147	157	0.69469	0.650442	0.672566	0.345471	0.741199
251	76	66	150	160	0.707965	0.663717	0.685841	0.372046	0.744596
252	83	71	143	155	0.685841	0.632743	0.659292	0.319034	0.745898
253	78	68	148	158	0.699115	0.654867	0.676991	0.354329	0.722698
254	79	66	147	160	0.707965	0.650442	0.679204	0.359001	0.744498
255	73	66	153	160	0.707965	0.676991	0.692478	0.385141	0.736559
256	78	76	148	150	0.663717	0.654867	0.659292	0.318597	0.727974
257	77	67	149	159	0.70354	0.659292	0.681416	0.363188	0.744293
258	77	64	149	162	0.716814	0.659292	0.688053	0.37673	0.742153
